# Supplementary material for: GENOMIC INVESTIGATIONS OF ACUTE HEPATITIS OF UNKNOWN AETIOLOGY IN CHILDREN
Source: bioRxiv or medRxiv preprint supplement (doi:10.1101/2022.07.28.22277963), 2022-07-28
Supplement: Supplementary file [file media-1.pdf]

# 1. DIAMONDS and PERFORM consortia

## 1.1. DIAMONDS Consortium

<https://www.diamonds2020.eu/>

### PARTNER: Imperial College (Coordinating Centre) (UK)

*Chief investigator/DIAMONDS coordinator:*

Michael Levin<sup>1</sup>

*Principal and co-investigators (alphabetical order)<sup>1</sup>*

Aubrey Cunnington; Jethro Herberg; Myrsini Kaforou; Victoria Wright

*Section of Paediatric Infectious Diseases Research Group (alphabetical order)<sup>1</sup>*

Evangelos Bellos; Claire Broderick; Samuel Channon-Wells; Samantha Cooray; Tisham De (database work package lead); Giselle D'Souza; Leire Estramiana Elorrieta; Diego Estrada-Rivadeneira; Rachel Galassini (Clinical Trial Manager); Dominic Habgood-Coote; Shea Hamilton (Proteomics); Heather Jackson; James Kavanagh; Mahdi Moradi Marjaneh; Stephanie Menikou; Samuel Nichols; Ruud Nijman; Harsita Patel; Ivana Pennisi; Oliver Powell; Ruth Reid; Priyen Shah; Ortensia Vito; Elizabeth Whittaker; Clare Wilson; Rebecca Womersley

*Recruitment team at Imperial College Healthcare NHS Trust, London (alphabetical order)<sup>2</sup>*

Amina Abdulla; Sarah Darnell; Sobia Mustafa

*Engineering Team*

Pantelis Georgiou<sup>3</sup> (engineering lead); Jesus-Rodriguez Manzano<sup>4</sup>; Nicolas Moser<sup>3</sup>; Ivana Pennisi<sup>1</sup>

<sup>1</sup>Section of Paediatric Infectious Disease, Imperial College London, Norfolk Place, London W2 1PG, UK

<sup>2</sup>Children's Clinical Research Unit, St Mary's Hospital, Praed Street, London W2 1NY, UK

<sup>3</sup> Imperial College London, Department of Electrical and Electronic Engineering, South Kensington Campus, London, SW7 2AZ, UK

<sup>4</sup> Imperial College London, Department of Infectious Disease, Section of Adult Infectious Disease, Hammersmith Campus, London, W12 0NN, UK

### UK Non-Consortium Clinical Recruiting Sites

*Evelina London Children's Hospital, Guy's and St Thomas' NHS Foundation Trust; King's College London [combined]*

37 Michael Carter<sup>1,2</sup> (principal investigator); Shane Tibby<sup>1,2</sup> (co-investigator)

38 *Recruitment team (alphabetical order):* Jonathan Cohen<sup>1</sup>; Francesca Davis<sup>1</sup>; Julia Kenny<sup>1</sup>; Paul Wellman<sup>1</sup>; Marie  
39 White<sup>1</sup>

40 *Laboratory team (alphabetical order):* Matthew Fish<sup>3</sup>; Aislinn Jennings<sup>4</sup>; Manu Shankar-Hari<sup>3,4</sup>

41

42 <sup>1</sup> Evelina London Children's Hospital, Guy's and St Thomas' NHS Foundation Trust, London, UK  
43 <sup>2</sup> Department of Women and Children's Health, School of Life Course Sciences, King's College London, UK  
44 <sup>3</sup> Department of Infectious Diseases, School of Immunology and Microbial Sciences, King's College London,  
45 London, UK  
46 <sup>4</sup> Department of Intensive Care Medicine, Guy's and St Thomas' NHS Foundation Trust, London, UK  
47

48 University Hospitals Sussex

49 Katy Fidler<sup>1</sup> (principal investigator); Dan Agranoff<sup>2</sup> (co-investigator)

50 *Recruitment team;* Vivien Richmond<sup>1,3</sup>, Mathew Seal<sup>2</sup>

51

52 <sup>1</sup> Royal Alexandra Children's Hospital, University Hospitals Sussex, Brighton, UK  
53 <sup>2</sup> Dept of Infectious Diseases, University Hospitals Sussex, Brighton, UK  
54 <sup>3</sup> Research Nurse team, University Hospitals Sussex, Brighton, UK  
55

56 University Hospital Southampton NHS Foundation Trust

57 Saul Faust<sup>1</sup> (principal investigator); Dan Owen<sup>1</sup> (co-investigator);

58 *Recruitment team;* Ruth Ensom<sup>2</sup>; Sarah McKay<sup>2</sup>; Diana Mondo<sup>3</sup>, Mariya Shaji<sup>3</sup>; Rachel Schranz<sup>3</sup> (*alphabetical*  
59 *order*)

60

61 <sup>1</sup> NIHR Southampton Clinical Research Facility, University Hospital Southampton NHS Foundation Trust and  
62 University of Southampton, UK  
63 <sup>2</sup> NIHR Southampton Clinical Research Facility, University Hospital Southampton NHS Foundation Trust, UK  
64 <sup>3</sup> Department of R&D, University Hospital Southampton NHS Foundation Trust, UK  
65

66 Barts Health NHS Trust

67 Prita Rughnani<sup>1,2,3</sup> (principal investigator 2020-2021); Amutha Anpananthar<sup>1,2,3</sup> (principal investigator 2021-  
68 to date); Susan Liebeschuetz<sup>2</sup> (co-investigator), Anna Riddell<sup>1</sup> (co-investigator)

69 *Recruitment team;* Nosheen Khalid<sup>1,3</sup>; Ivone Lancoma Malcolm, Teresa Simagan<sup>3</sup> (*alphabetical order*)

70

71 <sup>1</sup> Royal London Hospital, Whitechapel Rd, London E1 1FR, UK  
72 <sup>2</sup> Newham University Hospital, Glen Rd, London E13 8SL, UK  
73 <sup>3</sup> Whipps Cross University Hospital, *Whipps Cross* Road, London, E11 1NR, UK  
74

75 Great Ormond Street Hospital for Children NHS Foundation Trust

76 Mark Peters<sup>1,2</sup> (principal investigator); Alasdair Bamford<sup>1,2</sup> (co-investigator)

77 *Recruitment team;* Lauran O'Neill<sup>1</sup>

78 <sup>1</sup> Great Ormond Street Hospital, London, WC1N 3JH, UK  
79 <sup>2</sup> UCL Great Ormond St Institute of Child Health, WC1N 1EH, UK  
80

81 Cambridge University Hospitals NHS Foundation Trust

82 Nazima Pathan<sup>1,2</sup> (principal investigator)

83 *Recruitment team; Esther Daubney<sup>1</sup>, Deborah White<sup>1</sup> (alphabetical order)*

84 <sup>1</sup>Addenbrooke's Hospital, Hills Road, Cambridge CB2 0QQ, UK

85 <sup>2</sup>Department of Paediatrics, University of Cambridge, Cambridge CB2 0QQ, UK

86

87 University College London Hospitals NHS Foundation Trust

88 Melissa Heightman<sup>1</sup> (principal investigator); Sarah Eisen<sup>1</sup> (co-investigator)

89 *Recruitment team; Terry Segal<sup>1</sup>, Lucy Wellings<sup>1</sup> (alphabetical order)*

90 <sup>1</sup> University College London Hospital, Euston Road, London NW1 2BU, UK

91

92 St George's University Hospitals NHS Foundation Trust

93 Simon B Drysdale<sup>1</sup> (principal investigator)

94 *Recruitment team; Nicole Branch<sup>1</sup>, Lisa Hamzah<sup>1</sup>, Heather Jarman<sup>1</sup> (alphabetical order)*

95 <sup>1</sup> St George's Hospital, Blackshaw Road, London SW17 0QT, UK

96

97 Lewisham and Greenwich NHS Trust

98 Maggie Nyirenda<sup>1,2</sup>(principal investigator)

99 *Recruitment team Lisa Capozzi<sup>1</sup>, Emma Gardiner<sup>1</sup> (alphabetical order)*

100 <sup>1</sup>University Hospital Lewisham, London SE13 6LH, UK

101 <sup>2</sup>Queen Elizabeth Hospital Greenwich, London SE18 4QH, UK

102

103 Liverpool University Hospitals NHS Foundation Trust

104 Robert Moots<sup>1</sup> (principal investigator); Magda Nasher<sup>2</sup> (principal investigator)

105 *Recruitment team; Anita Hanson<sup>2</sup>; Michelle Linforth<sup>1</sup>*

106 <sup>1</sup> Aintree University Hospital, Lower Lane, Liverpool L9 7AL, UK

107 <sup>2</sup> Royal Liverpool Hospital, Prescot St, Liverpool L7 8XP, UK

108

109 Leeds Teaching Hospitals NHS Trust

110 Sean O'Riordan<sup>1</sup> (principal investigator)

111 *Recruitment team; Donna Ellis<sup>1</sup>*

112 <sup>1</sup>Leeds Children's Hospital, Leeds LS1 3EX, UK

113

114 King's College Hospital NHS Foundation Trust

115 Akash Deep<sup>1</sup> (principal investigator)

116 *Recruitment team; Ivan Caro*<sup>1</sup>  
117 <sup>1</sup> Kings College Hospital, Denmark Hill, London SE5 9RS, UK  
118  
119 *Sheffield Children's NHS Foundation Trust*  
120 Fiona Shackley <sup>1</sup> (principal investigator);  
121 *Recruitment team; Arianna Bellini,<sup>1</sup> Stuart Gormley<sup>1</sup> (alphabetical order)*  
122 <sup>1</sup>Sheffield Children's Hospital, Broomhall, Sheffield S10 2TH, UK  
123  
124 *University Hospitals of Leicester NHS Foundation Trust*  
125 Samira Neshat<sup>1</sup> (principal investigator)  
126 <sup>1</sup>Leicester General Hospital, Leicester LE1 5WW, UK  
127  
128 *Birmingham Women's and Children's Hospital NHS Foundation Trust*  
129 Barnaby J Scholefield<sup>1</sup> (principal investigator)  
130 *Recruitment team; Ceri Robbins<sup>1</sup>, Helen Winmill<sup>1</sup> (alphabetical order)*  
131 <sup>1</sup> Birmingham Children's Hospital, Steelhouse Lane, Birmingham B4 6NH, UK  
132 **PARTNER: University of Oxford (UK)**  
133  
134 **Children's Hospital, John Radcliffe Hospital, Oxford**  
135  
136 Principal Investigator  
137 Stéphane C. Paulus<sup>1,2,3</sup>  
138 Co-Principal Investigator  
139 Andrew J. Pollard<sup>1,2,3,4</sup>  
140  
141 Co-investigators  
142 Mark Anthony<sup>1</sup> (neonates)  
143  
144 Recruitment team  
145 Sarah Hopton<sup>1</sup>, Danielle Miller<sup>1</sup>, Zoe Oliver<sup>1</sup>, Sally Beer<sup>1</sup>, Bryony Ward<sup>1</sup>  
146  
147 <sup>1</sup>John Radcliffe Hospital, Oxford University Hospitals NHS Foundation Trust, Oxford, UK  
148 <sup>2</sup>Department of Paediatrics, University of Oxford, UK  
149 <sup>3</sup>Oxford Vaccine Group, University of Oxford, UK  
150 <sup>4</sup>NIHR Oxford Biomedical Research Centre, Oxford, UK  
151  
152  
153 **University of Oxford, Nepal Site**  
154 Principal Investigator  
155 Shrijana Shrestha<sup>1</sup>  
156  
157 Co-Principal Investigator  
158 Andrew J Pollard<sup>2,3</sup>  
159  
160 **Nepal Research Team**  
161 Meeru Gurung<sup>1</sup>

162 Puja Amatya<sup>1</sup>  
163 Bishma Pokhrel<sup>1</sup>  
164 Sanjeev Man Bijukchhe<sup>1</sup>  
165 **Oxford Research Team**  
166 Tim Lubinda<sup>2</sup>  
167 Sarah Kelly<sup>2</sup>  
168 Peter O'Reilly<sup>2</sup>  
169 <sup>1</sup>Paediatric Research Unit, Patan Academy of Health Sciences, Kathmandu, Nepal.  
170 <sup>2</sup>Oxford Vaccine Group, Department of Paediatrics, University of Oxford, Oxford, United Kingdom.  
171 <sup>3</sup>NIHR Oxford Biomedical Research Centre, Oxford, United Kingdom.

172  
173  
174 **PARTNER: SERGAS (Spain)**

175  
176 Principal Investigators  
177 Federico Martín-Torres<sup>1</sup>  
178 Antonio Salas<sup>1,2</sup>

179  
180 GENVIP RESEARCH GROUP (in alphabetical order):  
181 Fernando Álvarez González<sup>1</sup>, Xabier Bello<sup>1,2</sup>, Miriam Ben García<sup>1</sup>, Sandra Carnota<sup>1</sup>, Miriam Cebey-López<sup>1</sup>, María  
182 José Curras-Tuala<sup>1,2</sup>, Carlos Durán Suárez<sup>1</sup>, Luisa García Vicente<sup>1</sup>, Alberto Gómez-Carballa<sup>1,2</sup>, Jose Gómez Rial<sup>1</sup>,  
183 Pilar Leboráns Iglesias<sup>1</sup>, Federico Martín-Torres<sup>1</sup>, Nazareth Martín-Torres<sup>1</sup>, José María Martín Sánchez<sup>1</sup>,  
184 Belén Mosquera Pérez<sup>1</sup>, Jacobo Pardo-Seco<sup>1,2</sup>, Lidia Piñeiro Rodríguez<sup>1</sup>, Sara Pischedda<sup>1,2</sup>, Sara Rey Vázquez<sup>1</sup>,  
185 Irene Rivero Calle<sup>1</sup>, Carmen Rodríguez-Tenreiro<sup>1</sup>, Lorenzo Redondo-Collazo<sup>1</sup>, Miguel Sadiki Ora<sup>1</sup>, Antonio  
186 Salas<sup>1,2</sup>, Sonia Serén Fernández<sup>1</sup>, Cristina Serén Trasorras<sup>1</sup>, Marisol Vilas Iglesias<sup>1</sup>.

187  
188 <sup>1</sup> Translational Pediatrics and Infectious Diseases, Pediatrics Department, Hospital Clínico Universitario de  
189 Santiago, Santiago de Compostela, Spain, and GENVIP Research Group (www.genvip.org), Instituto de  
190 Investigación Sanitaria de Santiago, Universidad de Santiago de Compostela, Galicia, Spain.

191 <sup>2</sup>Unidade de Xenética, Departamento de Anatomía Patolóxica e Ciencias Forenses, Instituto de Ciencias Forenses,  
192 Facultade de Medicina, Universidade de Santiago de Compostela, and GenPop Research Group, Instituto de  
193 Investigacións Sanitarias (IDIS), Hospital Clínico Universitario de Santiago, Galicia, Spain

194 <sup>3</sup> Fundación Pública Galega de Medicina Xenómica, Servizo Galego de Saúde (SERGAS), Instituto de  
195 Investigacións Sanitarias (IDIS), and Grupo de Medicina Xenómica, Centro de Investigación Biomédica en Red  
196 de Enfermedades Raras (CIBERER), Universidade de Santiago de Compostela (USC), Santiago de Compostela,  
197 Spain

198  
199 **PARTNER: Liverpool (UK)**

200 Principal Investigators

201 Enitan D Carrol<sup>1,2</sup>

202

203 Research Group (in alphabetical order):

204 Elizabeth Cocklin<sup>1</sup>, Aakash Khanijau<sup>1</sup>, Rebecca Lenihan<sup>1</sup>, Nadia Lewis-Burke<sup>1</sup>

205 Karen Newall<sup>4</sup>, Sam Romaine<sup>1</sup>, <sup>1</sup> Department of Clinical Infection, Microbiology and Immunology, University of  
206 Liverpool Institute of Infection, Veterinary and Ecological Sciences, Liverpool, England

207 <sup>2</sup> Alder Hey Children's Hospital, Department of Infectious Diseases, Eaton Road, Liverpool, L12 2AP

208 <sup>3</sup> <sup>4</sup> Alder Hey Children's Hospital, Clinical Research Business Unit, Eaton Road, Liverpool, L12 2AP

209

210

211 **PARTNER: NATIONAL AND KAPODISTRIAN UNIVERSITY OF ATHENS (Greece)**

212 Principal Investigator: Maria Tsolia<sup>1</sup>

213 Co-Investigator: Irini Eleftheriou<sup>1</sup>

214  
215 PID Unit: Nikos Spyridis<sup>1</sup>, Maria Tambouratzi<sup>1</sup>  
216 Pediatric Rheumatology Unit: Despoina Maritsi<sup>1</sup>  
217 Lab: Antonios Marmarinos<sup>1</sup>, Marietta Xagorari<sup>1</sup>  
218  
219 Recruitment teams:  
220 Adult COVID19- Infectious Diseases: Lourida Panagiota, Pefanis Aggelos<sup>2</sup>  
221 Adult COVID19: Akinosoglou Karolina, Gogos Charalambos, Maragos Markos<sup>3</sup>  
222 Adult Inflammatory Diseases-Oncology: Voulgarelis Michalis , Stergiou Ioanna<sup>4</sup>  
223 <sup>1</sup>2<sup>nd</sup> Department of Pediatrics, National and Kapodistrian University of Athens (NKUA), Children’s Hospital “P,  
224 and A. Kyriakou”, Athens, Greece  
225 <sup>2</sup>1<sup>st</sup> Department of Infectious Diseases, General Hospital “Sotiria”  
226 <sup>3</sup>Pathology Department, University of Patras, General Hospital “Panagia i Voithia”  
227 <sup>4</sup>Pathophysiology Department, Medical Faculty, National and Kapodistrian University of Athens (NKUA),  
228 General Hospital “Laiko”  
229  
230 **Newcastle upon Tyne Hospitals NHS Foundation Trust and Newcastle University (UK) combined**  
231  
232 Principal Investigator:  
233 Marieke Emonts <sup>1,2,3</sup> (all activities)  
234  
235 Co-investigators  
236 Emma Lim<sup>2,3,6</sup> (all activities)  
237 John Isaacs<sup>1</sup> (adult inflammatory)  
238  
239 Recruitment team (alphabetical), datamanagers, and GNCH Research unit:  
240 Kathryn Bell<sup>4</sup>, Stephen Crulley<sup>4</sup>, Daniel Fabian<sup>4</sup>, Evelyn Thomson<sup>4</sup>, Diane Wallia<sup>4</sup>, Caroline Miller<sup>4</sup> , Ashley  
241 Bell<sup>4</sup>  
242 PhD Students/medical staff DIAMONDS  
243 Fabian J.S. van der Velden<sup>1,2</sup> (all activities), Geoff Shenton<sup>7</sup> (oncology), Ashley Price<sup>8,9</sup> (Adult COVID)  
244 Students  
245 Owen Treloar <sup>1,2</sup> (quality control, data management and analysis)  
246 Daisy Thomas<sup>1,2</sup> (recruitment)  
247 Author Affiliations:

- 248 <sup>1</sup> Translational and Clinical Research Institute, Newcastle University, Newcastle upon Tyne UK
- 249 <sup>2</sup>Great North Children's Hospital, Paediatric Immunology, Infectious Diseases & Allergy, Newcastle upon Tyne  
250 Hospitals NHS Foundation Trust, Newcastle upon Tyne, United Kingdom.
- 251 <sup>3</sup>NIHR Newcastle Biomedical Research Centre based at Newcastle upon Tyne Hospitals NHS Trust and  
252 Newcastle University, Westgate Rd, Newcastle upon Tyne NE4 5PL, United Kingdom
- 253 <sup>4</sup>Great North Children's Hospital, Research Unit, Newcastle upon Tyne Hospitals NHS Foundation Trust,  
254 Newcastle upon Tyne, United Kingdom.
- 255 <sup>6</sup>Population Health Sciences Institute, Newcastle University, Newcastle upon Tyne, UK
- 256 <sup>7</sup>Great North Children's Hospital, Paediatric Oncology, Newcastle upon Tyne Hospitals NHS Foundation Trust,  
257 Newcastle upon Tyne, United Kingdom.
- 258 <sup>8</sup>Department of Infection & Tropical Medicine, Newcastle upon Tyne Hospitals NHS Foundation Trust,  
259 Newcastle upon Tyne, United Kingdom
- 260 <sup>9</sup>NIHR Newcastle In Vitro Diagnostics Co-operative (Newcastle MIC), Newcastle upon Tyne, United Kingdom.

261

262 **Servicio Madrileño de Salud (SERMAS) - Fundación Biomédica del Hospital Universitario 12 de Octubre**  
263 **(FIB-H12O) (Spain)**

264 Principal Investigators

265 Pablo Rojo<sup>1 3</sup>

266 Cristina Epalza<sup>1,2</sup>

267 SERMAS/FIB-H120 team:

268 Serena Villaverde<sup>1</sup>, Sonia Márquez<sup>2</sup>, Manuel Gijón<sup>2</sup>, Fátima Machín<sup>2</sup>, Laura Cabello<sup>2</sup>, Irene Hernández<sup>2</sup>,  
269 Lourdes Gutiérrez<sup>2</sup>, Ángela Manzanares<sup>1</sup>

270 Author Affiliations:

271 <sup>1</sup> Servicio Madrileño de Salud (SERMAS), Pediatric Infectious Diseases Unit, Department of Pediatrics,  
272 Hospital Universitario 12 de Octubre, Madrid, Spain

273 <sup>2</sup>Fundación Biomédica del Hospital Universitario 12 de Octubre (FIB-H12O), Unidad Pediátrica de Investigación  
274 y Ensayos Clínicos (UPIC), Hospital Universitario 12 de Octubre, Instituto de Investigación Sanitaria Hospital  
275 12 de Octubre (i+12), Madrid, Spain.

276 <sup>3</sup> Universidad Complutense de Madrid, Faculty of Medicine, Department of Pediatrics, Madrid, Spain.

277

278 **Amsterdam University Medical Center (Amsterdam UMC), University of Amsterdam**

279

280 Principal Investigator:

281 T.W. (Taco) Kuijpers MD PhD<sup>1,2</sup> (all activities)

282

283 Co-investigators

284 M. (Martijn) van de Kuip MD PhD<sup>1</sup> (infectious disease)

285 A.M. (Marceline) van Furth MD PhD <sup>1</sup> (infectious disease)  
286 J.M. (Merlijn) van den Berg MD PhD <sup>1</sup> (inflammatory disease)  
287  
288 Hospital Team (all activities):  
289 Giske Biesbroek MD PhD <sup>1</sup>, Floris Verkuil MD (PhD student) <sup>1</sup>, Carlijn (C.W.) van der Zee MD (start 1/8/2022,  
290 PhD student) <sup>1</sup>  
291 Recruitment:  
292 Dasja Pajkrt MD PhD <sup>1</sup>, Michael Boele van Hensbroek MD PhD <sup>1</sup>, Dienneke Schonenberg MD <sup>1</sup>, Mariken Gruppen  
293 MD <sup>1</sup>, Sietse Nagelkerke MD PhD <sup>1,2</sup>, medical students  
294  
295 Laboratory Team:  
296 Machiel H Jansen <sup>1</sup>, Ines Goetschalckx (PhD student) <sup>2</sup>  
297  
298 Author Affiliations:  
299 <sup>1</sup> Amsterdam UMC, Emma Children's Hospital, Dept of Pediatric Immunology, Rheumatology and Infectious  
300 Disease, University of Amsterdam, The Netherlands  
301 <sup>2</sup> Sanquin, Dept of Molecular Hematology, University Medical Center, Amsterdam, The Netherlands  
302  
303 **Bambino Gesù Children's Hospital (Rome-Italy)**  
304 Principal Investigator  
305 Lorenza Romani 1  
306 Maia De Luca 1  
307  
308 Recruitment Team  
309 Sara Chiurchiù 1  
310 Martina Di Giuseppe 1  
311  
312 Affiliation  
313 1 Infectious Disease Unit, Academic Department of Pediatrics, Bambino Gesù Children's Hospital, IRCCS, Rome  
314 00165, Italy  
315



316 **ERASMUS MC-Sophia Children's Hospital**

317 *Principal Investigator*

318 Clementien L. Vermont<sup>2</sup>

319

320 *Research group*

321 Henriëtte A. Moll<sup>1</sup>, Dorine M. Borensztajn<sup>1</sup>, Nienke N. Hagedoorn, Chantal Tan <sup>1</sup>, Joany Zachariasse <sup>1</sup>, Medical  
322 students <sup>1</sup>

323

324 Additional investigator

325 W Dik <sup>3</sup>

326

327 <sup>1</sup> Erasmus MC-Sophia Children's Hospital, Department of General Paediatrics, Rotterdam, the Netherlands

328 <sup>2</sup> Erasmus MC-Sophia Children's Hospital, Department of Paediatric Infectious Diseases & Immunology,  
329 Rotterdam, the Netherlands

330 <sup>3</sup> Erasmus MC, Department of immunology, Rotterdam, the Netherlands

331

332 **TAIWAN**

333 Ching-Fen (Kitty), Shen

334 Division of Infectious Disease, Department of Pediatrics, National Cheng Kung University

335 Tainan, Taiwan

336

337 **Riga Stradins University (Riga, Latvia)**

338

339 Principal Investigator:

340 Dace Zavadzka <sup>1,2</sup> (all activities)

341

342 Co-investigators

343 Sniedze Laivacuma <sup>1,3</sup> (adult cohorts)

344

345 Recruitment team:

346 Aleksandra Rudzate <sup>1,2</sup>, Diana Stoldere <sup>1,2</sup>, Arta Barzdina <sup>1,2</sup>, Elza Barzdina <sup>1,2</sup>, Sniedze Laivacuma<sup>1,3</sup>, Monta  
347 Madelane <sup>1,3</sup>

348

349 Laboratory

350 Dagne Gravele <sup>2</sup>, Dace Svile<sup>2</sup>

351  
352  
353  
354  
355  
356  
357  
358  
359  
360  
361  
362  
363  
364  
365  
366  
367  
368  
369  
370  
371  
372  
373  
374  
375  
376  
377  
378  
379  
380  
381  
382  
383  
384

Author Affiliations:

- <sup>1</sup> Riga Stradins University, Riga, Latvia
- <sup>2</sup> Children clinical university hospital, Riga, Latvia
- <sup>3</sup> Riga East clinical university hospital, Riga, Latvia

**Assistance Publique - Hôpitaux de Paris**

Principal Investigator:

Romain Basmaci <sup>1,2</sup>

Co-investigator:

Noémie Lachaume <sup>1</sup>

Recruitment team:

Pauline Bories <sup>1</sup>, Raja Ben Tkhayat <sup>1</sup>, Laura Chériaux <sup>1</sup>, Juraté Davoust <sup>1</sup>, Kim-Thanh Ong <sup>1</sup>, Marie Cotillon <sup>1</sup>, Thibault de Groc <sup>1</sup>, Sébastien Le <sup>1</sup>, Nathalie Vergnault <sup>1</sup>, Hélène Sée <sup>1</sup>, Laure Cohen <sup>1</sup>, Alice de Tugny <sup>1</sup>, Nevena Danekova <sup>1</sup>

Author Affiliations:

- <sup>1</sup> Service de Pédiatrie-Urgences, AP-HP, Hôpital Louis-Mourier, F-92700 Colombes, France
- <sup>2</sup> Université Paris Cité, Inserm, IAME, F-75018 Paris, France

**BioMérieux**

Principal Investigator:

Marine Mommert-Tripon

Co-investigator:

Karen Brengel-Pesce

Author Affiliations:

bioMérieux - Open Innovation & Partnerships Department, Lyon, France

**University Medical Centre Ljubljana, Slovenia**

Principal Investigator: Marko Pokorn <sup>1,2,3</sup>

Co-Investigator: Mojca Kolnik<sup>2</sup>

385 Research Group (in alphabetical order):

386 Tadej Avčin<sup>2,3</sup>, Tanja Avramoska<sup>2</sup>, Natalija Bahovec<sup>1</sup>, Petra Bogovič<sup>1</sup>, Lidija Kitanovski<sup>2,3</sup>, Mirijam Nahtigal<sup>1</sup>,  
387 Lea Papst<sup>1</sup>, Tina Plankar Srovin<sup>1</sup>, Franc Strle<sup>1,2</sup>, Anja Srpčič<sup>2</sup>, Katarina Vinček<sup>1</sup>.

388

389 Affiliations:

- 390 1. Department of Infectious diseases, University Medical Centre Ljubljana, Slovenia
- 391 2. University Children's Hospital, University Medical Centre Ljubljana, Slovenia
- 392 3. Faculty of Medicine, University of Ljubljana, Slovenia
- 393 4. Centre for Clinical research, University Medical Centre Ljubljana

394

395 **University Medical Center Utrecht, Utrecht, The Netherlands**

396 Principal Investigator

397 Michiel van der Flier<sup>1,5</sup> (Pediatric Infectious Diseases and Immunology)

398

399 Co-investigators

400 Wim J.E. Tissing<sup>5</sup> (Pediatric Oncology)

401 Roelie M. Wösten-van Asperen<sup>2</sup> (Pediatric Intensive Care Unit)

402 Sebastiaan J Vastert<sup>3</sup> (Pediatric Rheumatology)

403 Daniel C Vijlbrief<sup>4</sup> (Pediatric Neonatal Intensive Care)

404 Louis J. Bont<sup>1,5</sup> (Pediatric Infectious Diseases and Immunology)

405 Tom F.W. Wolfs<sup>1,5</sup> (Pediatric Infectious Diseases and Immunology)

406

407 PhD student

408 Coco R. Beudeker<sup>1,5</sup> (Pediatric Infectious Diseases and Immunology)

409

410 Affiliations:

411 1. Pediatric Infectious Diseases and Immunology, 2. Pediatric Intensive Care Unit 3. Pediatric Rheumatology 4.  
412 Pediatric Neonatal Intensive Care, Wilhelmina Children's Hospital, University Medical Center Utrecht, Utrecht,  
413 The Netherlands

414 5. Princess Maxima Center for Pediatric Oncology, Utrecht, The Netherlands

415

416 **PARTNER: University of Bern, Inselspital, Bern University Hospital, University of Bern (Switzerland)**

417

418 Principal Investigators (alphabetical)

419 Philipp Agyeman<sup>1</sup>

420 Luregn Schlapbach<sup>2,3</sup>

421

422 Co-Investigator

423 Christoph Aebi<sup>1</sup>  
424

425 Recruitment team

426 Mariama Usman<sup>1</sup>, Stefanie Schlüchter<sup>1</sup>, Verena Wyss<sup>1</sup>, Nina Schöbi<sup>1</sup>, Elisa Zimmermann<sup>2</sup> PhD, Marion Meier<sup>2</sup>,  
427 Kathrin Weber<sup>2</sup>

428

429 <sup>1</sup> Department of Pediatrics, Inselspital, Bern University Hospital, University of Bern, Switzerland

430 <sup>2</sup> Department of Intensive Care and Neonatology, and Children`s Research Center, University Children`s Hospital  
431 Zurich, Zurich, Switzerland

432 <sup>3</sup> Child Health Research Centre, The University of Queensland, Brisbane, Australia

433

434 **Swiss Pediatric Sepsis Study group**

435 Philipp Agyeman, MD <sup>1</sup>, Luregn J Schlapbach, MD, FCICM <sup>2,3</sup>, Eric Giannoni, MD <sup>4,5</sup>, Martin Stocker, MD <sup>6</sup>,  
436 Klara M Posfay-Barbe, MD <sup>7</sup>, Ulrich Heininger, MD <sup>8</sup>, Sara Bernhard-Stirnemann, MD <sup>9</sup>, Anita Niederer-Loher,  
437 MD <sup>10</sup>, Christian Kahlert, MD <sup>10</sup>, Giancarlo Natalucci, MD <sup>11</sup>, Christa Relly, MD <sup>12</sup>, Thomas Riedel, MD <sup>13</sup>,  
438 Christoph Aebi, MD <sup>1</sup>, Christoph Berger, MD <sup>12</sup>

439

440 **Affiliations:**

441 <sup>1</sup> Department of Pediatrics, Inselspital, Bern University Hospital, University of Bern, Switzerland

442 <sup>2</sup> Department of Intensive Care and Neonatology, and Children`s Research Center, University Children`s Hospital  
443 Zurich, Zurich, Switzerland

444 <sup>3</sup> Child Health Research Centre, The University of Queensland, Brisbane, Australia

445 <sup>4</sup> Clinic of Neonatology, Department Mother-Woman-Child, Lausanne University Hospital and University of  
446 Lausanne, Switzerland

447 <sup>5</sup> Infectious Diseases Service, Department of Medicine, Lausanne University Hospital and University of  
448 Lausanne, Switzerland

449 <sup>6</sup> Department of Pediatrics, Children`s Hospital Lucerne, Lucerne, Switzerland

450 <sup>7</sup> Pediatric Infectious Diseases Unit, Children`s Hospital of Geneva, University Hospitals of Geneva, Geneva,  
451 Switzerland

452 <sup>8</sup> Infectious Diseases and Vaccinology, University of Basel Children`s Hospital, Basel, Switzerland

453 <sup>9</sup> Children`s Hospital Aarau, Aarau, Switzerland

454 <sup>10</sup> Division of Infectious Diseases and Hospital Epidemiology, Children`s Hospital of Eastern Switzerland St.  
455 Gallen, St. Gallen, Switzerland

456 <sup>11</sup> Department of Neonatology, University Hospital Zurich, Zurich, Switzerland

457 <sup>12</sup> Division of Infectious Diseases and Hospital Epidemiology, and Children`s Research Center, University  
458 Children`s Hospital Zurich, Switzerland

459 <sup>13</sup> Children`s Hospital Chur, Chur, Switzerland

460

461 **Micropathology Ltd (UK)**

462 Micropathology Ltd, The Venture Center, University of Warwick Science Park, Sir William Lyons Road,  
463 Coventry, CV4 7EZ

464 Principle Investigator; Prof Colin Fink

465 Co Investigators: Marie Voice, Leo Calvo-Bado, Michael Steele, Jennifer Holden

466 Research group: Benjamin Evans, Jake Stevens, Peter Matthews, Kyle Billing

467

468 **Medical University of Graz, Austria (MUG)**

469 Principal Investigator:

470 Werner Zenz<sup>1</sup> (all activities)

471 Co-investigators (in alphabetical order):

472 Alexander Binder<sup>1</sup> (grant application)

473 Benno Kohlmaier<sup>1</sup> (study design, recruitment)

474 Daniela S. Kohlfürst<sup>1</sup> (study design)

475 Nina A. Schweintzger<sup>1</sup> (all activities)

476 Christoph Zurl<sup>1</sup> (study design, recruitment)

477

478 Recruitment team, data managers, laboratory work (in alphabetical order):

479 Susanne Hösele<sup>1</sup>, Manuel Leitner<sup>1</sup>, Lena Pölz<sup>1</sup>, Alexandra Rusu<sup>1</sup>, Glorija Rajic<sup>1</sup>, Bianca Stoiser<sup>1</sup>, Martina  
480 Strempl<sup>1</sup>, Manfred G. Sagmeister<sup>1</sup>

481

482 Clinical recruitment partners (in alphabetical order):

483 Sebastian Bauchinger<sup>1</sup>, Martin Benesch<sup>3</sup>, Astrid Ceolotto<sup>1</sup>, Ernst Eber<sup>2</sup>, Siegfried Gallistl<sup>1</sup>, Harald Haidl<sup>1</sup>,  
484 Almuthe Hauer<sup>1</sup>, Christa Hude<sup>1</sup>, Andreas Kapper<sup>7</sup>, Markus Keldorfer<sup>5</sup>, Sabine Löffler<sup>5</sup>, Tobias Niedrist<sup>6</sup>,  
485 Heidemarie Pilch<sup>5</sup>, Andreas Pflieger<sup>2</sup>, Klaus Pfurtscheller<sup>4</sup>, Siegfried Rödl<sup>4</sup>, Andrea Skrabl-Baumgartner<sup>1</sup>, Volker  
486 Strenger<sup>3</sup>, Elmar Wallner<sup>7</sup>

487

488 Author Affiliations:

489 <sup>1</sup> Department of Pediatrics and Adolescent Medicine, Division of General Pediatrics, Medical University of Graz,  
490 Graz, Austria

491 <sup>2</sup>Department of Pediatric Pulmonology, Medical University of Graz, Graz, Austria

492 <sup>3</sup>Department of Pediatric Hematooncology, Medical University of Graz, Graz, Austria

493 <sup>4</sup>Paediatric Intensive Care Unit, Medical University of Graz, Graz, Austria

494 <sup>5</sup>University Clinic of Pediatrics and Adolescent Medicine Graz, Medical University Graz, Graz, Austria

495 <sup>6</sup>Clinical Institute of Medical and Chemical Laboratory Diagnostics, Medical University Graz, Graz, Austria

496 <sup>7</sup>Department of Internal Medicine, State Hospital Graz II, Location West, Graz, Austria

497

498 **SkylineDX**

499 Principle investigator: Dennie Tempel<sup>1</sup>

500 Co-investigators: Danielle van Keulen<sup>1</sup>, Annelieke M Strijbosch<sup>1</sup>,

501 Author affiliations:

502 <sup>1</sup> SkylineDx, Rotterdam, The Netherlands

503

504 **Project partner BBMRI-ERIC**

505 Maïke K. Tauchert

506 Author affiliation:

507 Biobanking and BioMolecular Resources Research Infrastructure - European Research Infrastructure Consortium  
508 (BBMRI-ERIC), Neue Stiftingtalstrasse 2/B/6, 8010, Graz, Austria

509

510 **LMU Munich Partner (Germany)**

511 Principal Investigator:

512 Ulrich von Both<sup>1,2</sup> MD, FRCPCH (all activities)

513

514 Research group:

515 Laura Kolberg<sup>1</sup> MSc (all activities)

516 Patricia Schmied<sup>1</sup> (Study physician), Irene Alba-Alejandre<sup>3</sup> MD (Study physician)

517

518 Clinical recruitment partners (in alphabetical order):

519 Katharina Danhauser, MD<sup>6</sup>, Nikolaus Haas, MD<sup>11</sup>, Florian Hoffmann, MD<sup>10</sup>, Matthias Griese, MD<sup>7</sup>, Tobias  
520 Feuchtinger, MD<sup>5</sup>, Sabrina Juranek, MD<sup>4</sup>, Matthias Kappler, MD<sup>7</sup>, Eberhard Lurz, MD<sup>8</sup>, Esther Maier, MD<sup>4</sup>, Karl  
521 Reiter, MD<sup>10</sup>, Carola Schoen, MD<sup>10</sup>, Sebastian Schroepf, MD<sup>9</sup>

522

523 Author Affiliations:

524 <sup>1</sup> Division of Pediatric Infectious Diseases, Department of Pediatrics, Dr. von Hauner Children's Hospital,  
525 University Hospital, LMU Munich, Munich, Germany

526 <sup>2</sup> German Center for Infection Research (DZIF), Partner Site Munich, Munich, Germany

527 <sup>3</sup> Department of Gynecology and Obstetrics, University Hospital, LMU Munich, Munich, Germany

528 <sup>4</sup> Division of General Pediatrics, Department of Pediatrics, Dr. von Hauner Children's Hospital, University  
529 Hospital, LMU Munich, Munich, Germany

530 <sup>5</sup> Division of Pediatric Haematology & Oncology, Department of Pediatrics, Dr. von Hauner Children's Hospital,  
531 University Hospital, LMU Munich, Munich, Germany

532 <sup>6</sup> Division of Pediatric Rheumatology, Department of Pediatrics, Dr. von Hauner Children's Hospital, University  
533 Hospital, LMU Munich, Munich, Germany

534 <sup>7</sup> Division of Pediatric Pulmonology, Department of Pediatrics, Dr. von Hauner Children's Hospital, University  
535 Hospital, LMU Munich, Munich, Germany

536 <sup>8</sup> Division of Pediatric Gastroenterology, Department of Pediatrics, Dr. von Hauner Children's Hospital,  
537 University Hospital, LMU Munich, Munich, Germany

538 <sup>9</sup> Neonatal Intensive Care Unit, Department of Pediatrics, Dr. von Hauner Children's Hospital, University  
539 Hospital, LMU Munich, Munich, Germany

540 <sup>10</sup> Paediatric Intensive Care Unit, Department of Pediatrics, Dr. von Hauner Children's Hospital, University  
541 Hospital, LMU Munich, Munich, Germany

542 <sup>11</sup> Department of Pediatric Cardiology and Pediatric Intensive Care, University Hospital, LMU Munich, Germany

543

544 **London School of Hygiene and Tropical Medicine (LSHTM)**

545 Principal Investigator: Shunmay Yeung<sup>1,2,3</sup>

546

547 Research group:

548 Manuel Dewez<sup>1</sup> David Bath<sup>3</sup>, Elizabeth Fitchett<sup>1</sup>, Fiona Cresswell<sup>1</sup>

549

550 1. Clinical Research Department, Faculty of Infectious and Tropical Disease, London School of Hygiene  
551 and Tropical Medicine, London

552 2. Department of Paediatrics, St. Mary's Imperial College Hospital, London

553 3. Department of Global Health and Development, Faculty of Public Health and Policy, London School of  
554 Hygiene and Tropical Medicine, London

555

556 **1.2. PERFORM Consortium**

557

558 <https://www.perform2020.org/>

559

560 **PARTNER: IMPERIAL COLLEGE (UK)**

561 Chief investigator/PERFORM coordinator:

562 Michael Levin

563

564 Principal and co-investigators; work package leads (alphabetical order)

565 Aubrey Cunnington (grant application)

566 Tisham De (work package lead)

567 Jethro Herberg (Principle Investigator, Deputy Coordinator, grant application)

568 Myrsini Kaforou (grant application, work package lead)

569 Victoria Wright (grant application, Scientific Coordinator)

570

571 Research Group (alphabetical order)

572 Lucas Baumard; Evangelos Bellos; Giselle D'Souza; Rachel Galassini; Dominic Habgood-Coote; Shea Hamilton;  
573 Clive Hoggart; Sara Hourmat; Heather Jackson; Ian Maconochie; Stephanie Menikou; Naomi Lin; Samuel  
574 Nichols; Ruud Nijman; Ivonne Pena Paz; Oliver Powell, Priyen Shah; Ching-Fen Shen; Clare Wilson

575

576 Clinical recruitment at Imperial College Healthcare NHS Trust (alphabetical order)

577 Amina Abdulla; Ladan Ali; Sarah Darnell; Rikke Jorgensen; Sobia Mustafa; Salina Persand

578

579 Imperial College Faculty of Engineering

580 Molly Stevens (co-investigator), Eunjung Kim (research group); Benjamin Pierce (research group)

581

582 Clinical recruitment at Brighton and Sussex University Hospitals

583 Katy Fidler (Principle Investigator)

584 Julia Dudley (Clinical Research Registrar)

585 Research nurses: Vivien Richmond, Emma Tavliavini

586

587 Clinical recruitment at National Cheng Kung University Hospital

588 Ching-Fen Shen (Principal Investigator); Ching-Chuan Liu (Co-investigator); Shih-Min Wang (Co-investigator),  
589 funded by the Center of Clinical Medicine Research, National Cheng Kung University

590

591 **PARTNER: SERGAS (Spain)**

592 Principal Investigators

593 Federico Martinón-Torres<sup>1</sup>

594 Antonio Salas<sup>1,2</sup>

595

596 Research Group (alphabetical order)

597 Fernando Álvez González<sup>1</sup>, Cristina Balo Farto<sup>1</sup>, Ruth Barral-Arca<sup>1,2</sup>, María Barreiro Castro<sup>1</sup>, Xabier Bello<sup>1,2</sup>,  
598 Mirian Ben García<sup>1</sup>, Sandra Carnota<sup>1</sup>, Miriam Cebey-López<sup>1</sup>, María José Curras-Tuala<sup>1,2</sup>, Carlos Durán Suárez<sup>1</sup>,  
599 Luisa García Vicente<sup>1</sup>, Alberto Gómez-Carballea<sup>1,2</sup>, Jose Gómez Rial<sup>1</sup>, Pilar Leboráns Iglesias<sup>1</sup>, Federico  
600 Martinón-Torres<sup>1</sup>, Nazareth Martinón-Torres<sup>1</sup>, José María Martinón Sánchez<sup>1</sup>, Belén Mosquera Pérez<sup>1</sup>, Jacobo  
601 Pardo-Seco<sup>1,2</sup>, Lidia Piñeiro Rodríguez<sup>1</sup>, Sara Pischedda<sup>1,2</sup>, Sara Rey Vázquez<sup>1</sup>, Irene Rivero Calle<sup>1</sup>, Carmen  
602 Rodríguez-Tenreiro<sup>1</sup>, Lorenzo Redondo-Collazo<sup>1</sup>, Miguel Sadiki Ora<sup>1</sup>, Antonio Salas<sup>1,2</sup>, Sonia Serén Fernández<sup>1</sup>,  
603 Cristina Serén Trasorras<sup>1</sup>, Marisol Vilas Iglesias<sup>1</sup>.

604

605 <sup>1</sup> Translational Pediatrics and Infectious Diseases, Pediatrics Department, Hospital Clínico Universitario de  
606 Santiago, Santiago de Compostela, Spain, and GENVIP Research Group ([www.genvip.org](http://www.genvip.org)), Instituto de  
607 Investigación Sanitaria de Santiago, Universidad de Santiago de Compostela, Galicia, Spain.

608 <sup>2</sup>Unidade de Xenética, Departamento de Anatomía Patolóxica e Ciencias Forenses, Instituto de Ciencias Forenses,  
609 Facultade de Medicina, Universidade de Santiago de Compostela, and GenPop Research Group, Instituto de  
610 Investigacións Sanitarias (IDIS), Hospital Clínico Universitario de Santiago, Galicia, Spain

611 <sup>3</sup> Fundación Pública Galega de Medicina Xenómica, Servizo Galego de Saúde (SERGAS), Instituto de  
612 Investigacións Sanitarias (IDIS), and Grupo de Medicina Xenómica, Centro de Investigación Biomédica en Red  
613 de Enfermedades Raras (CIBERER), Universidade de Santiago de Compostela (USC), Santiago de Compostela,  
614 Spain

615

616 **PARTNER: RSU (Latvia)**

617 Principal Investigator

618 Dace Zavadska<sup>1,2</sup>



619

620 Other RSU group authors (in alphabetical order):

621 Anda Balode<sup>1,2</sup>, Arta Bārzdiņa<sup>1,2</sup>, Dārta Deksnē<sup>1,2</sup>, Dace Gardovska<sup>1,2</sup>, Dagne Grāvele<sup>2</sup>, Ilze Grope<sup>1,2</sup>, Anija  
622 Meiere<sup>1,2</sup>, Ieva Nokalna<sup>1,2</sup>, Jana Pavāre<sup>1,2</sup>, Zanda Pučuka<sup>1,2</sup>, Katrīna Selecka<sup>1,2</sup>, Aleksandra Sidorova<sup>1,2</sup>, Dace  
623 Svile<sup>2</sup>, Urzula Nora Urbāne<sup>1,2</sup>.

624

625 <sup>1</sup> Riga Stradins university, Riga, Latvia.

626 <sup>2</sup> Children clinical university hospital, Riga, Latvia.

627

628 **PARTNER: Medical Research Council Unit The Gambia (MRCG) at LSHTM**

629 Principal Investigator

630 Effua Usuf

631

632 Additional Investigators

633 Kalifa Bojang

634 Syed M. A. Zaman

635 Fatou Secka

636 Suzanne Anderson

637 Anna RocaIsatou Sarr

638 Momodou Saïdykhan

639 Saffiatou Darboe

640 Samba Ceesay

641 Umberto D'alessandro

642

643 Medical Research Council Unit The Gambia at LSHTM

644 P O Box 273,

645 Fajara, The Gambia

646

647 **PARTNER: ERASMUS MC-Sophia Children's Hospital (Netherlands)**

648 Principal Investigator

649 Henriëtte A. Moll<sup>1</sup>

650

651 Research Group (alphabetical order)

652 Dorine M. Borensztajn<sup>1</sup>, Nienke N. Hagedoorn, Chantal Tan <sup>1, 1</sup>, Clementien L. Vermont<sup>2</sup>, Joany Zachariasse <sup>1</sup>

653

654 Additional investigator

655 W Dik <sup>3</sup>

656

657 <sup>1</sup> Erasmus MC-Sophia Children's Hospital, Department of General Paediatrics, Rotterdam, the Netherlands

658 <sup>2</sup> Erasmus MC-Sophia Children's Hospital, Department of Paediatric Infectious Diseases & Immunology,  
659 Rotterdam, the Netherlands

660 <sup>3</sup> Erasmus MC, Department of immunology, Rotterdam, the Netherlands

661

662 **PARTNER: Swiss Pediatric Sepsis Study (Switzerland)**

663 Principal Investigators:

664 Philipp Agyeman, MD <sup>1</sup> (ORCID 0000-0002-8339-5444), Luregn J Schlapbach, MD, FCICM <sup>2,3</sup> (ORCID 0000-  
665 0003-2281-2598)

666

667 Clinical recruitment at University Children's Hospital Bern for PERFORM:

668 Christoph Aebi <sup>1</sup>, Verena Wyss <sup>1</sup>, Mariama Usman <sup>1</sup>

669

670 Principal and co-investigators for the Swiss Pediatric Sepsis Study:

671 Philipp Agyeman, MD <sup>1</sup>, Luregn J Schlapbach, MD, FCICM <sup>2,3</sup>, Eric Giannoni, MD <sup>4,5</sup>, Martin Stocker, MD <sup>6</sup>,  
672 Klara M Posfay-Barbe, MD <sup>7</sup>, Ulrich Heininger, MD <sup>8</sup>, Sara Bernhard-Stirnemann, MD <sup>9</sup>, Anita Niederer-Loher,  
673 MD <sup>10</sup>, Christian Kahlert, MD <sup>10</sup>, Giancarlo Natalucci, MD <sup>11</sup>, Christa Relly, MD <sup>12</sup>, Thomas Riedel, MD <sup>13</sup>,  
674 Christoph Aebi, MD <sup>1</sup>, Christoph Berger, MD <sup>12</sup> for the Swiss Pediatric Sepsis Study

675

676 <sup>1</sup> Department of Pediatrics, Inselspital, Bern University Hospital, University of Bern, Switzerland

677 <sup>2</sup> Neonatal and Pediatric Intensive Care Unit, Children's Research Center, University Children's Hospital Zurich,  
678 University of Zurich, Zurich, Switzerland

679 <sup>3</sup>Child Health Research Centre, University of Queensland, and Queensland Children's Hospital, Brisbane,  
680 Australia

681 <sup>4</sup> Clinic of Neonatology, Department Mother-Woman-Child, Lausanne University Hospital and University of  
682 Lausanne, Switzerland

683 <sup>5</sup> Infectious Diseases Service, Department of Medicine, Lausanne University Hospital and University of  
684 Lausanne, Switzerland

685 <sup>6</sup> Department of Pediatrics, Children's Hospital Lucerne, Lucerne, Switzerland

686 <sup>7</sup> Pediatric Infectious Diseases Unit, Children's Hospital of Geneva, University Hospitals of Geneva, Geneva,  
687 Switzerland

688 <sup>8</sup> Infectious Diseases and Vaccinology, University of Basel Children's Hospital, Basel, Switzerland

689 <sup>9</sup> Children's Hospital Aarau, Aarau, Switzerland

690 <sup>10</sup> Division of Infectious Diseases and Hospital Epidemiology, Children's Hospital of Eastern Switzerland St.  
691 Gallen, St. Gallen, Switzerland

692 <sup>11</sup> Department of Neonatology, University Hospital Zurich, Zurich, Switzerland

693 <sup>12</sup> Division of Infectious Diseases and Hospital Epidemiology, and Children's Research Center, University  
694 Children's Hospital Zurich, Switzerland

695 <sup>13</sup> Children's Hospital Chur, Chur, Switzerland

696

697 **PARTNER: Liverpool (UK)**

698 Principal Investigators

699 Enitan D Carrol<sup>1,2,3</sup>

700 Stéphane Paulus <sup>1</sup>,

701

702 Research Group (alphabetical order)

703 Elizabeth Cocklin<sup>1</sup>, Rebecca Jennings<sup>4</sup>, Joanne Johnston<sup>4</sup>, Simon Leigh<sup>1</sup>, Karen Newall<sup>4</sup>, Sam Romaine<sup>1</sup>

704

705 <sup>1</sup> Department of Clinical Infection, Microbiology and Immunology, University of Liverpool Institute of Infection  
706 and Global Health , Liverpool, England

707 <sup>2</sup> Alder Hey Children's Hospital, Department of Infectious Diseases, Eaton Road, Liverpool, L12 2AP

708 <sup>3</sup> Liverpool Health Partners, 1<sup>st</sup> Floor, Liverpool Science Park, 131 Mount Pleasant, Liverpool, L3 5TF

709 <sup>4</sup>Alder Hey Children's Hospital, Clinical Research Business Unit, Eaton Road, Liverpool, L12 2AP

710

711 **PARTNER: NKUA (Greece)**

712 Principal investigator

713 Professor Maria Tsolia (all activities)

714

715 Investigator/Research fellow

716 Irini Eleftheriou (all activities)

717

718 Additional investigators

719 Recruitment: Maria Tambouratzi

720 Lab: Antonis Marmarinos (Quality Manager)

721 Lab: Marietta Xagorari

722 Kelly Syggelou

723 2<sup>nd</sup> Department of Pediatrics, National and Kapodistrian University of Athens,

724 “P. and A. Kyriakou” Children’s Hospital

725 Thivon and Levadias

726 Goudi, Athens

727

728 **PARTNER : Micropathology Ltd (UK)**

729 Principal Investigator

730 Professor Colin Fink<sup>1</sup>, Clinical Microbiologist

731

732 Additional investigators

733 Dr Marie Voice<sup>1</sup>, Post doc scientist

734 Dr. Leo Calvo-Bado<sup>1</sup>, Post doc scientist

735 <sup>1</sup> Micropathology Ltd, The Venture Center, University of Warwick Science Park, Sir William Lyons Road,  
736 Coventry, CV4 7EZ.

737

738 **PARTNER : Medical University of Graz (MUG, Austria)**

739 Principal Investigator

740 Werner Zenz<sup>1</sup> (all activities)

741

742 Co-investigators (alphabetical order)

743 Benno Kohlmaier<sup>1</sup> (all activities)

744 Nina A. Schweintzger<sup>1</sup> (all activities)

745 Manfred G. Sagmeister<sup>1</sup> (study design, consortium wide sample management)

746 Research team

747 Daniela S. Kohlfürst<sup>1</sup> (study design)

748 Christoph Zurl<sup>1</sup> (BIVA PIC)

749 Alexander Binder<sup>1</sup> (grant application)

750

751 Recruitment team, data managers, (alphabetical order)

752 Susanne Hösele<sup>1</sup>, Manuel Leitner<sup>1</sup>, Lena Pölz<sup>1</sup>, Glorija Rajic<sup>1</sup>,

753

754 Clinical recruitment partners (alphabetical order)

755 Sebastian Bauchinger<sup>1</sup>, Hinrich Baumgart<sup>4</sup>, Martin Benesch<sup>3</sup>, Astrid Ceolotto<sup>1</sup>, Ernst Eber<sup>2</sup>, Siegfried Gallistl<sup>1</sup>,  
756 Gunther Gores<sup>5</sup>, Harald Haidl<sup>1</sup>, Almuthe Hauer<sup>1</sup>, Christa Hude<sup>1</sup>, Markus Keldorfer<sup>5</sup>, Larissa Krenn<sup>4</sup>, Heidemarie  
757 Pilch<sup>5</sup>, Andreas Pflieger<sup>2</sup>, Klaus Pfurtscheller<sup>4</sup>, Gudrun Nordberg<sup>5</sup>, Tobias Niedrist<sup>8</sup>, Siegfried Rödl<sup>4</sup>, Andrea  
758 Skrabl-Baumgartner<sup>1</sup>, Matthias Sperl<sup>7</sup>, Laura Stampfer<sup>5</sup>, Volker Strenger<sup>3</sup>, Holger Till<sup>6</sup>, Andreas Trobisch<sup>5</sup>,  
759 Sabine Löffler<sup>5</sup>

760

761 <sup>1</sup> Department of Pediatrics and Adolescent Medicine, Division of General Pediatrics, Medical University of Graz,  
762 Graz, Austria

763 <sup>2</sup>Department of Pediatric Pulmonology, Medical University of Graz, Graz, Austria

764 <sup>3</sup>Department of Pediatric Hematooncoloy, Medical University of Graz, Graz, Austria

765 <sup>4</sup>Paediatric Intensive Care Unit, Medical University of Graz, Graz, Austria

766 <sup>5</sup>University Clinic of Paediatrics and Adolescent Medicine Graz, Medical University Graz, Graz, Austria

767 <sup>6</sup>Department of Paediatric and Adolescence Surgery, Medical University Graz, Graz, Austria

768 <sup>7</sup>Department of Pediatric Orthopedics, Medical University Graz, Graz, Austria

769 <sup>8</sup>Clinical Institute of Medical and Chemical Laboratory Diagnostics, Medical University Graz, Graz, Austria

770

771 **PARTNER: London School of Hygiene and Tropical Medicine (UK)**

772 WP 1 WP2, WP5

773 Principal Investigator:

774 Dr Shunmay Yeung<sup>1,2,3</sup> PhD, MBBS, FRCPCH, MRCP, DTM&H

775

776 Research Group

777 Dr Juan Emmanuel Dewez<sup>1</sup> MD, DTM&H, MSc

778 Prof Martin Hibberd<sup>1</sup> BSc, PhD

779 Mr David Bath<sup>2</sup> MSc, MappFin, BA(Hons)

780 Dr Alec Miners<sup>2</sup> BA(Hons), MSc, PhD

781 Dr Ruud Nijman<sup>3</sup> PhD MSc MD MRCPCH

782 Dr Catherine Wedderburn<sup>1</sup> BA, MBChB, DTM&H, MSc, MRCPCH

783 Ms Anne Meierford<sup>1</sup> MSc, BmedSc, BMBS

784 Dr Baptiste Leurent<sup>4</sup>, PhD, MSc

785

786 1. Faculty of Infectious and Tropical Disease, London School of Hygiene and Tropical Medicine, London,  
787 UK

788 2. Faculty of Public Health and Policy, London School of Hygiene and Tropical Medicine, London, UK

789 3. Department of Paediatrics, St. Mary's Hospital Imperial College Hospital, London, UK

790 4. Faculty of Epidemiology and Population Health, London School of Hygiene and Tropical Medicine,  
791 London, UK

792

793 **PARTNER: Radboud University Medical Center (RUMC, Netherlands)**

794 Principal Investigators

795 Ronald de Groot<sup>1</sup>, Michiel van der Flier<sup>1,2,3</sup>, Marien I. de Jonge<sup>1</sup>

796

797 Co-investigators Radboud University Medical Center (alphabetical order)

798 Koen van Aerde<sup>1,2</sup>, Wynand Alkema<sup>1</sup>, Bryan van den Broek<sup>1</sup>, Jolein Gloerich<sup>1</sup>, Alain J. van Gool<sup>1</sup>, Stefanie  
799 Henriët<sup>1,2</sup>, Martijn Huijnen<sup>1</sup>, Ria Philipsen<sup>1</sup>, Esther Willems<sup>1</sup>

800

801 Investigators PeDBIG PERFORM DUTCH CLINICAL NETWORK (alphabetical order)

802 G.P.J.M. Gerrits<sup>8</sup>, M. van Leur<sup>8</sup>, J. Heidema<sup>4</sup>, L. de Haan<sup>1,2</sup>, C.J. Miedema<sup>5</sup>, C. Neeleman<sup>1</sup>, C.C. Obihara<sup>6</sup>, G.A.  
803 Trammer-Stranders<sup>7,6</sup>

804

- 805 1. Radboud University Medical Center, Nijmegen, The Netherlands  
806 2. Amalia Children's Hospital, Nijmegen, The Netherlands  
807 3. Wilhelmina Children's Hospital, University Medical Center Utrecht, Utrecht, The Netherlands  
808 4. St. Antonius Hospital, Nieuwegein, The Netherlands  
809 5. Catharina Hospital, Eindhoven, The Netherlands  
810 6. ETZ Elisabeth, Tilburg, The Netherlands  
811 7. Franciscus Gasthuis, Rotterdam, The Netherlands  
812 8. Canisius Wilhelmina Hospital, Nijmegen, The Netherlands  
813

814

815 **PARTNER: Oxford (UK)**

816 Principal Investigators

817 Andrew J. Pollard<sup>1,2</sup>, Rama Kandasamy<sup>1,2</sup>, Stéphane Paulus<sup>1,2</sup>

818

819 Additional Investigators

820 Michael J. Carter<sup>1,2</sup>, Daniel O'Connor<sup>1,2</sup>, Sagida Bibi<sup>1,2</sup>, Dominic F. Kelly<sup>1,2</sup>, Meeru Gurung<sup>3</sup>, Stephen Thorson<sup>3</sup>,  
821 Imran Ansari<sup>3</sup>, David R. Murdoch<sup>4</sup>, Shrijana Shrestha<sup>3</sup>.

822

823 <sup>1</sup>Oxford Vaccine Group, Department of Paediatrics, University of Oxford, Oxford, United Kingdom.

824 <sup>2</sup>NIHR Oxford Biomedical Research Centre, Oxford, United Kingdom.

825 <sup>3</sup>Paediatric Research Unit, Patan Academy of Health Sciences, Kathmandu, Nepal.

826 <sup>4</sup>Department of Pathology, University of Otago, Christchurch, New Zealand.

827

828 **PARTNER: Newcastle University, Newcastle upon Tyne, (UK)**

829 Principal Investigator

- 830 Marieke Emonts<sup>1,2,3</sup> (all activities)
- 831
- 832 Co-investigators
- 833 Emma Lim<sup>2,3,7</sup> (all activities)
- 834 Lucille Valentine<sup>4</sup>
- 835
- 836 Recruitment team (alphabetical), data-managers, and GNCH Research unit
- 837 Karen Allen<sup>5</sup>, Kathryn Bell<sup>5</sup>, Adora Chan<sup>5</sup>, Stephen Crulley<sup>5</sup>, Kirsty Devine<sup>5</sup>, Daniel Fabian<sup>5</sup>, Sharon King<sup>5</sup>, Paul  
838 McAlinden<sup>5</sup>, Sam McDonald<sup>5</sup>, Anne McDonnell<sup>2,5</sup>, Ailsa Pickering<sup>2,5</sup>, Evelyn Thomson<sup>5</sup>, Amanda Wood<sup>5</sup>, Diane  
839 Wallia<sup>5</sup>, Phil Woodsford<sup>5</sup>,
- 840 Sample processing: Frances Baxter<sup>5</sup>, Ashley Bell<sup>5</sup>, Mathew Rhodes<sup>5</sup>
- 841
- 842 PICU recruitment
- 843 Rachel Agbeko<sup>8</sup>
- 844 Christine Mackerness<sup>8</sup>
- 845
- 846 Students MOFICHE
- 847 Bryan Baas<sup>2</sup>, Lieke Kloosterhuis<sup>2</sup>, Wilma Oosthoek<sup>2</sup>
- 848
- 849 Students/medical staff PERFORM
- 850 Tasnim Arif<sup>6</sup>, Joshua Bennet<sup>2</sup>, Calvin Collings<sup>2</sup>, Ilona van der Giessen<sup>2</sup>, Alex Martin<sup>2</sup>, Aqeela Rashid<sup>6</sup>, Emily  
851 Rowlands<sup>2</sup>, Gabriella de Vries<sup>2</sup>, Fabian van der Velden<sup>2</sup>
- 852
- 853 Engagement work/ethics/cost effectiveness
- 854 Lucille Valentine<sup>4</sup>, Mike Martin<sup>9</sup>, Ravi Mistry<sup>2</sup>, Lucille Valentine<sup>4</sup>
- 855
- 856 <sup>1</sup> Translational and Clinical Research Institute, Newcastle University, Newcastle upon Tyne UK
- 857 <sup>2</sup>Great North Children's Hospital, Paediatric Immunology, Infectious Diseases & Allergy, Newcastle upon Tyne  
858 Hospitals NHS Foundation Trust, Newcastle upon Tyne, United Kingdom.
- 859 <sup>3</sup>NIHR Newcastle Biomedical Research Centre based at Newcastle upon Tyne Hospitals NHS Trust and  
860 Newcastle University, Westgate Rd, Newcastle upon Tyne NE4 5PL, United Kingdom
- 861 <sup>4</sup>Newcastle University Business School, Centre for Knowledge, Innovation, Technology and Enterprise (KITE),  
862 Newcastle upon Tyne, United Kingdom
- 863 <sup>5</sup>Great North Children's Hospital, Research Unit, Newcastle upon Tyne Hospitals NHS Foundation Trust,  
864 Newcastle upon Tyne, United Kingdom.

865 <sup>6</sup>Great North Children's Hospital, Paediatric Oncology, Newcastle upon Tyne Hospitals NHS Foundation Trust,  
866 Newcastle upon Tyne, United Kingdom.

867 <sup>7</sup>Population Health Sciences Institute, Newcastle University, Newcastle upon Tyne, UK

868 <sup>8</sup>Great North Children's Hospital, Paediatric Intensive Care Unit, Newcastle upon Tyne Hospitals NHS  
869 Foundation Trust, Newcastle upon Tyne, United Kingdom.

870 <sup>9</sup>Northumbria University, Newcastle upon Tyne, United Kingdom.

871

872 **PARTNER: LMU Munich (Germany)**

873 Principal Investigator

874 Ulrich von Both<sup>1,2</sup> MD, FRCPCH (all activities)

875

876 Research group

877 Laura Kolberg<sup>1</sup> MSc (all activities)

878 Manuela Zwerenz<sup>1</sup> MSc, Judith Buschbeck<sup>1</sup> PhD

879

880 Clinical recruitment partners (alphabetical order)

881 Christoph Bidlingmaier<sup>3</sup>, Vera Binder<sup>4</sup>, Katharina Danhauser<sup>5</sup>, Nikolaus Haas<sup>10</sup>, Matthias Griese<sup>6</sup>, Tobias  
882 Feuchtinger<sup>4</sup>, Julia Keil<sup>9</sup>, Matthias Kappler<sup>6</sup>, Eberhard Lurz<sup>7</sup>, Georg Muench<sup>8</sup>, Karl Reiter<sup>9</sup>, Carola Schoen<sup>9</sup>

883

884 <sup>1</sup>Div. Paediatric Infectious Diseases, Hauner Children's Hospital, University Hospital, Ludwig Maximilians  
885 University (LMU), Munich, Germany

886 <sup>2</sup>German Center for Infection Research (DZIF), Partner Site Munich, Munich, Germany

887 <sup>3</sup>Div. of General Paediatrics, <sup>4</sup>Div. Paediatric Haematology & Oncology, <sup>5</sup>Div. of Paediatric Rheumatology, <sup>6</sup>Div.  
888 of Paediatric Pulmonology, <sup>7</sup>Div. of Paediatric Gastroenterology, <sup>8</sup>Neonatal Intensive Care Unit, <sup>9</sup>Paediatric  
889 Intensive Care Unit Hauner Children's Hospital, University Hospital, Ludwig Maximilians University (LMU),  
890 Munich, Germany, <sup>10</sup>Department Pediatric Cardiology and Pediatric Intensive Care, University Hospital, Ludwig  
891 Maximilians University (LMU), Munich, Germany

892

893 **PARTNER: bioMérieux (France)**

894 Principal Investigator

895 François Mallet<sup>1,2,3</sup>

896

897 Research Group

898 Karen Brengel-Pesce<sup>1,2,3</sup>

899 Alexandre Pachot<sup>1</sup>

900 Marine Mommert<sup>1,2</sup>



901

902 <sup>1</sup>Open Innovation & Partnerships (OIP), bioMérieux S.A., Marcy l'Etoile, France

903 <sup>2</sup>Joint research unit Hospice Civils de Lyon – bioMérieux, Centre Hospitalier Lyon Sud, 165 Chemin du Grand  
904 Revoyet, 69310 Pierre-Bénite, France

905 <sup>3</sup>EA 7426 Pathophysiology of Injury-induced Immunosuppression, University of Lyon1-Hospices Civils de  
906 Lyon-bioMérieux, Hôpital Edouard Herriot, 5 Place d'Arsonval, 69437 Lyon Cedex 3, France

907

908 **PARTNER: University Medical Centre Ljubljana (Slovenia)**

909 Principal Investigator

910 Marko Pokorn<sup>1,2,3</sup> MD, PhD

911

912 Research Group

913 Mojca Kolnik<sup>1</sup> MD, Katarina Vincek<sup>1</sup> MD, Tina Plankar Srovin<sup>1</sup> MD, PhD, Natalija Bahovec<sup>1</sup> MD, Petra Prunk<sup>1</sup>  
914 MD, Veronika Osterman<sup>1</sup> MD, Tanja Avramoska<sup>1</sup> MD

915

916 <sup>1</sup>Department of Infectious Diseases, University Medical Centre Ljubljana, Japljeva 2, SI-1525 Ljubljana, Slovenia

917 <sup>2</sup>University Childrens' Hospital, University Medical Centre Ljubljana, Ljubljana, Slovenia

918 <sup>3</sup>Department of Infectious Diseases and Epidemiology, Faculty of Medicine, University of Ljubljana, Slovenia

919

920 **PARTNER: Amsterdam, Academic Medical Hospital & Sanquin Research Institute (Netherlands)**

921 Principal Investigator

922 Taco Kuijpers <sup>1,2</sup>

923

924 Co-investigators

925 Ilse Jongerius <sup>2</sup>

926

927 Recruitment team (EUCLIDS, PERFORM)

928 J.M. van den Berg<sup>1</sup>, D. Schonenberg<sup>1</sup>, A.M. Barendregt<sup>1</sup>, D. Pajkrt<sup>1</sup>, M. van der Kuip<sup>1,3</sup>, A.M. van Furth<sup>1,3</sup>

929

930 Students PERFORM

931 Evelien Sprenkeler <sup>2</sup>, Judith Zandstra <sup>2</sup>

932

933 Technical support PERFORM

934 G. van Mierlo <sup>2</sup>, J. Geissler <sup>2</sup>

935

936 <sup>1</sup> Amsterdam University Medical Center (Amsterdam UMC), location Academic Medical Center (AMC), Dept of  
937 Pediatric Immunology, Rheumatology and Infectious Diseases, University of Amsterdam, Amsterdam, the  
938 Netherlands

939 <sup>2</sup> Sanquin Research Institute, & Landsteiner Laboratory at the AMC, University of Amsterdam, Amsterdam, the  
940 Netherlands.

941 <sup>3</sup> Amsterdam University Medical Center (Amsterdam UMC), location Vrije Universiteit Medical Center  
942 (VUMC), Dept of Pediatric Infectious Diseases and Immunology, Free University (VU), Amsterdam, the  
943 Netherlands (former affiliation)

944
